# Supplementary material
Source: PubMed Central journal article supplement (PMC5328981)

**Suppl. 1 Diabetic nephropathy develops in mice with MDMX deletion in endocrine pancreas.** **A)** Representative pictures showing significant ascitic fluid in MDMX-knockout mice at the age of 8 months (lower). **B)** Representative images of H&E staining on paraffin kidney sections showing that global glomerulosclerosis was developed in MDMX-knockout mice at the age of around 8 months. **C)** Representative images of PAS staining on paraffin kidney sections of 8-month-old mice. Arrows indicate typical Kimmelstiel-Wilson nodules of late-stage diabetic nephropathy in MDMX-knockout mice.

*Suppl. 1*

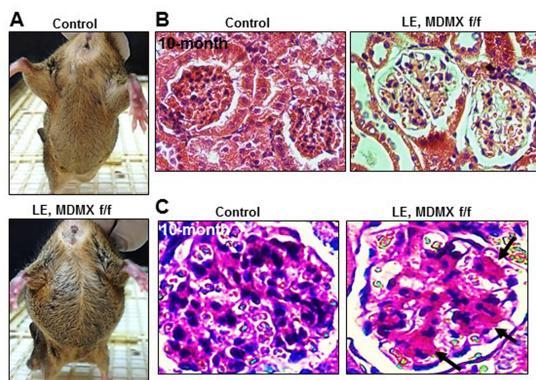

Supplement: NIHMS847775-supplement.pdf [file NIHMS847775-supplement.pdf]
